# Supplementary material for: Enhancement in the efficiency of Sb2(S,Se)3 thin-film solar cells with spin-coating NiOx as the hole transport layer
Source: Royal Society of Chemistry journal article supplement (doi:10.1039/d3tc03734g), 2024-01-01
Supplement: d3tc03734g1.pdf [file d3tc03734g1.pdf]

## **Enhancement in the efficiency of $\text{Sb}_2(\text{S,Se})_3$ thin-film solar cells with Spin-coating $\text{NiO}_x$ as the hole transport layer**

*Shan Huang<sup>a#</sup>, Yelei Xing<sup>b#</sup>, Honcheng Zhu<sup>a</sup>, Tingyu Zhang<sup>b</sup>, Kangjun Geng<sup>a</sup>, Yusheng Yang<sup>b</sup>, QingYan Gu<sup>a</sup>, Sai Jiang<sup>a\*</sup>, Jianhua Qiu<sup>a\*</sup>, Huafei Guo<sup>a\*</sup>, Ningyi Yuan<sup>b</sup>, and Jianning Ding<sup>c</sup>*

*<sup>a</sup> School of Microelectronics and Control Engineering, Changzhou University, Changzhou 213164, China*

*<sup>b</sup> School of materials science and engineering, Changzhou University, Changzhou, 213164, China*

*<sup>c</sup> Yangzhou University Technological Institute of Carbon Neutralization, Yangzhou University, Yangzhou, 225127, China*

# The author contributes equally to this work

E-mail: [guohuafei@cczu.edu.cn](mailto:guohuafei@cczu.edu.cn); [saijiang@cczu.edu.cn](mailto:saijiang@cczu.edu.cn); [jhqu@cczu.edu.cn](mailto:jhqu@cczu.edu.cn);

## **1. Experimental details**

### **1.1. Device fabrication**

First, the FTO substrate was ultrasonically cleaned with detergent, ultrapure water, and ethanol for 30 min and treated with ozone for 15 min. A 60-nm film of CdS was then deposited on the FTO as an electron transfer layer using chemical bath deposition for 6 min. The coating was spun with CdCl<sub>2</sub> (20-mg mL<sup>-1</sup> cadmium chloride methanol solution) for 30 s at 3000 rpm, followed by annealing at 400 °C for 10 min and a natural cooling process. Sb<sub>2</sub>(S,Se)<sub>3</sub> films were deposited on CdS substrates using a hydrothermal method with a modified 0.2671 g of KSbC<sub>4</sub>H<sub>4</sub>O<sub>7</sub>·0.5H<sub>2</sub>O, 0.7942 g of Na<sub>2</sub>S<sub>2</sub>O<sub>3</sub>·5H<sub>2</sub>O, 0.02 g of CH<sub>4</sub>N<sub>2</sub>Se, 0.04 g of EDTA, and 0.25 g of NH<sub>4</sub>F were added to a Teflon jar (50 ml) with 40 ml of ultrapure water and heated in a drying oven at 130 °C for 180 min to perform a hydrothermal reaction. Next, ultrapure water was used to wash the samples and the resulting Sb<sub>2</sub>(S,Se)<sub>3</sub> films were placed under a nitrogen atmosphere and annealed at 350 °C for 15 min. Furthermore, NiO<sub>x</sub> film were deposited on Sb<sub>2</sub>(S,Se)<sub>3</sub> using the spin-coating method. The spin-coated NiO<sub>x</sub> films were then placed on a hot table and annealed under an air atmosphere. Finally, Thermal evaporation was used to create gold electrodes with a surface area of 0.07 cm<sup>2</sup> and a thickness of 60 nm.

### **1.2. Measurements and characterization**

The surface morphologies of the NiO<sub>x</sub> and Sb<sub>2</sub>(S,Se)<sub>3</sub> films were characterised by scanning electron microscopy (SEM, SEM-S4800, Hitachi). The surface roughness of the NiO<sub>x</sub> and Sb<sub>2</sub>(S,Se)<sub>3</sub> films was characterised using atomic force microscopy (AFM; Nano Man VS, Veeco). XRD patterns of the NiO<sub>x</sub> films annealed at different temperatures (Nihon Reiji D/Max 2500PC). The elemental composition of NiO<sub>x</sub> films was determined using X-ray photoelectron spectrometry (XPS). The current density–voltage (J–V) curves of the Sb<sub>2</sub>(S,Se)<sub>3</sub> thin-film solar cells were simulated using a source metre (2400) under standard illumination (100 mW cm<sup>-2</sup>). The dark J–V curves of the devices were measured from –1 to +2 V under dark conditions. A photovoltaic characterisation system (QEXL) was used to determine the solar cells' external quantum

efficiency. In complete darkness, electrochemical impedance spectroscopy (EIS) was carried out at 0.60 V from 10 Hz to 4 MHz. Uv-vis spectrophotometry (Shimadzu UV-2600) was used to analyze the optical characteristics of the  $\text{Sb}_2(\text{S, Se})_3$  and  $\text{NiO}_x$  films. A PHI 5000 VersaProbe III with a He I source (21.22 eV) and an applied negative bias of 9.0 V was used to conduct ultraviolet photoelectron spectroscopy (UPS). A precision LCR meter (E4980AL) was used to measure capacitive voltage (C-V) in the dark with a bias voltage ranging from -1 to +1 V.

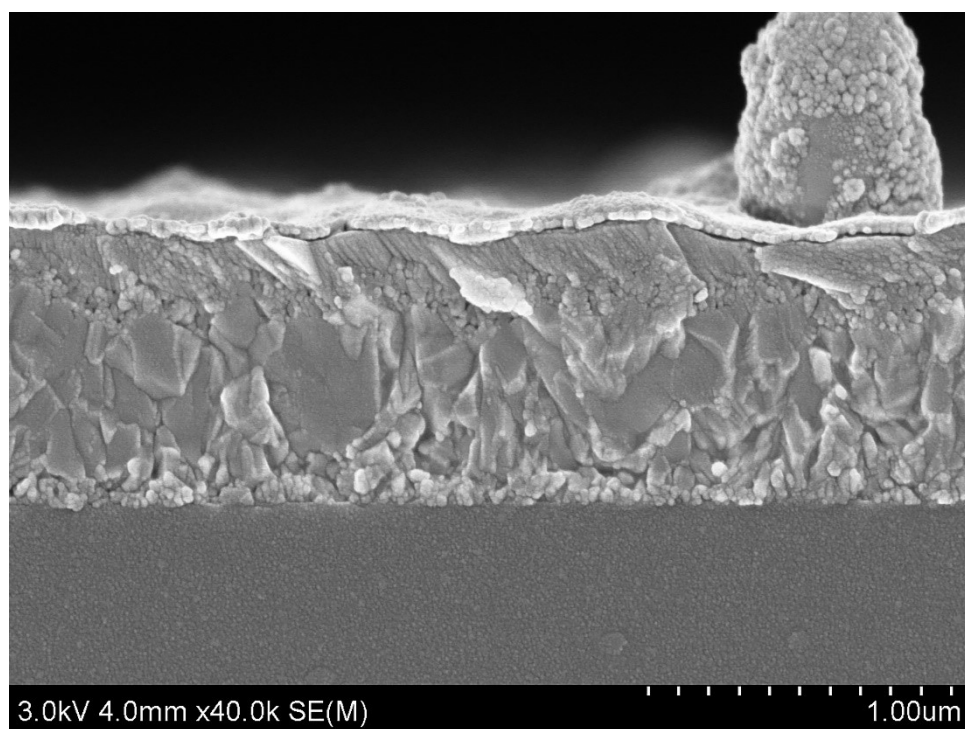

**Fig. S1.** The cross-sectional SEM image of  $2.5 \text{ mg mL}^{-1}$ .

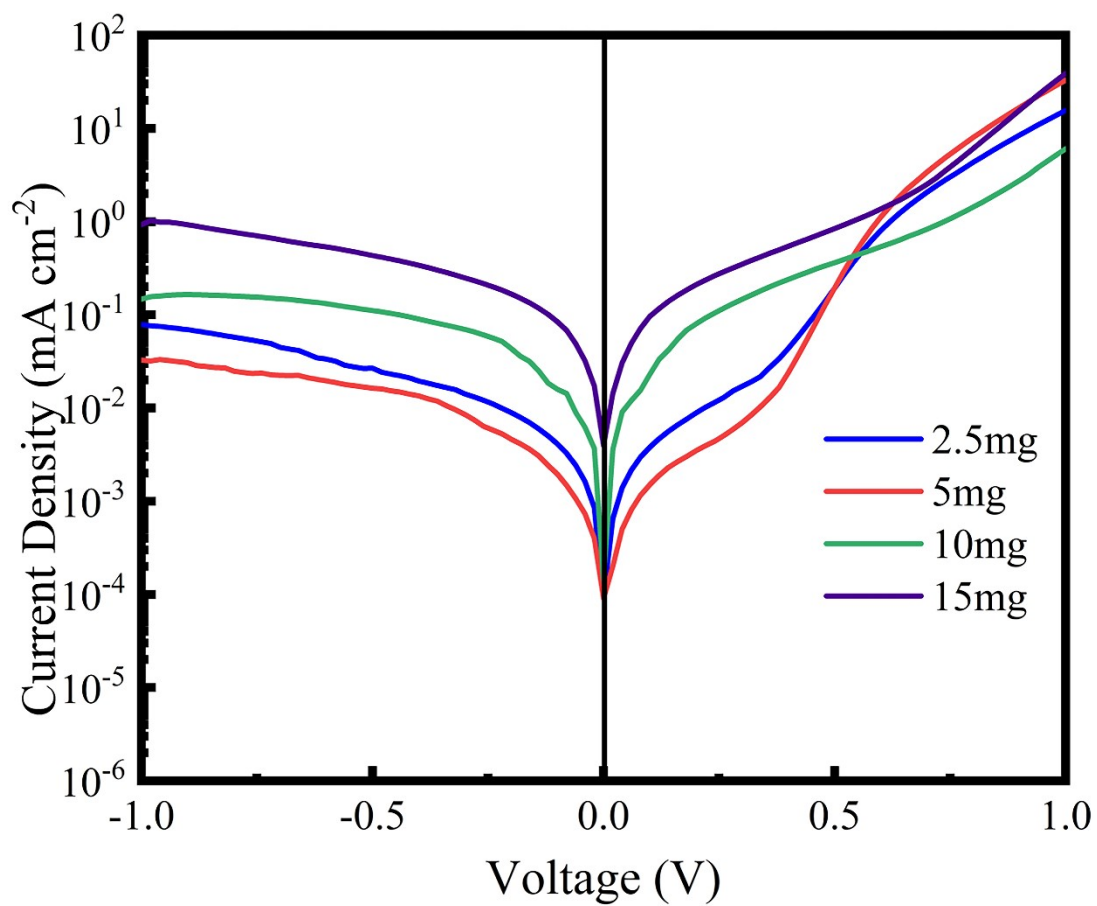

Fig. S2. Dark  $J$ - $V$  curves of different concentrations

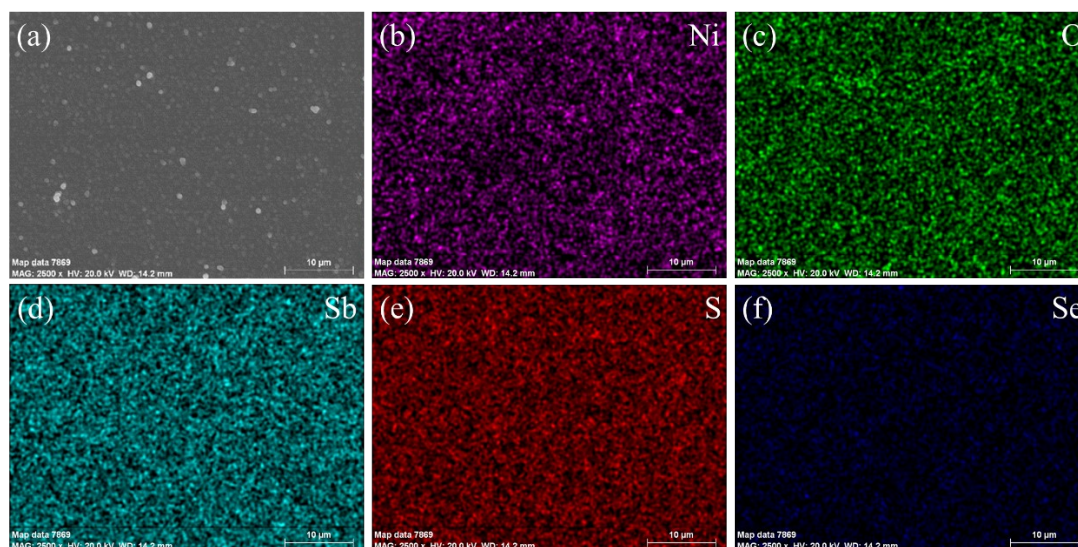

Fig. S3. EDS patterns of  $\text{Sb}_2(\text{S,Se})_3$  films based on  $5 \text{ mg mL}^{-1} \text{ NiO}_x$ .

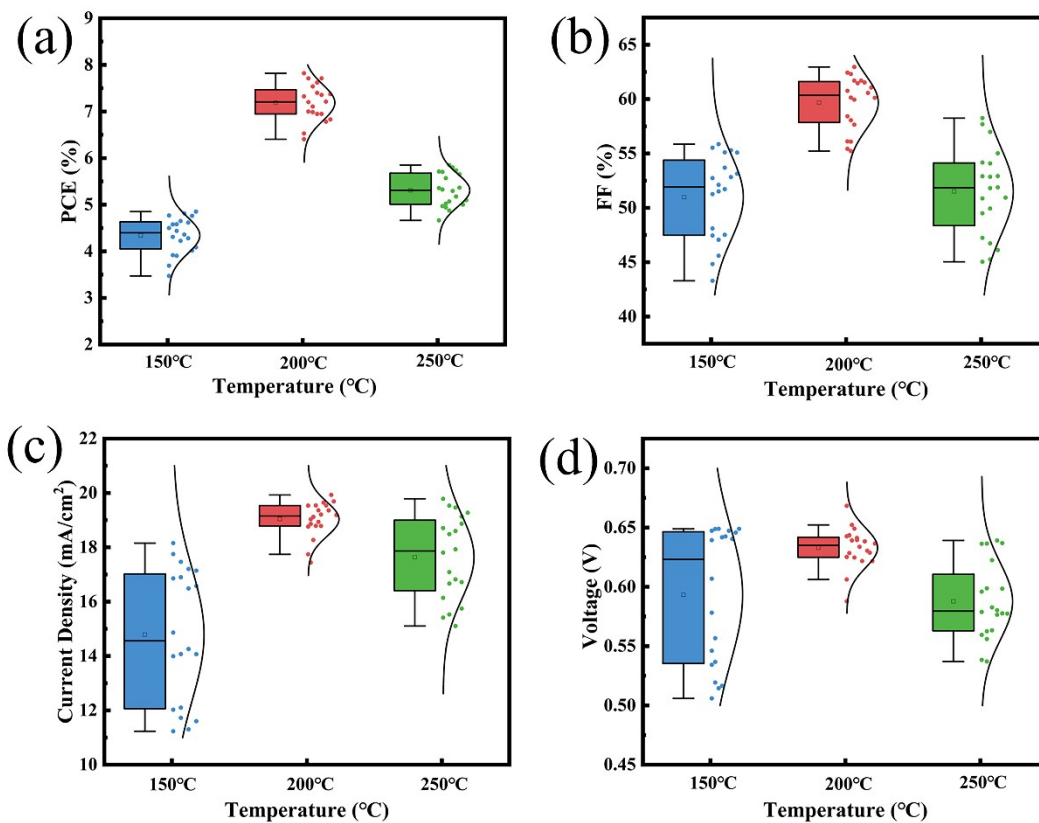

**Fig. S4.** Photovoltaic parameters based on different temperatures of NiO<sub>x</sub> (a) PCE, (b)  $FF$ , (c)  $J_{SC}$ , (d)  $V_{OC}$ .

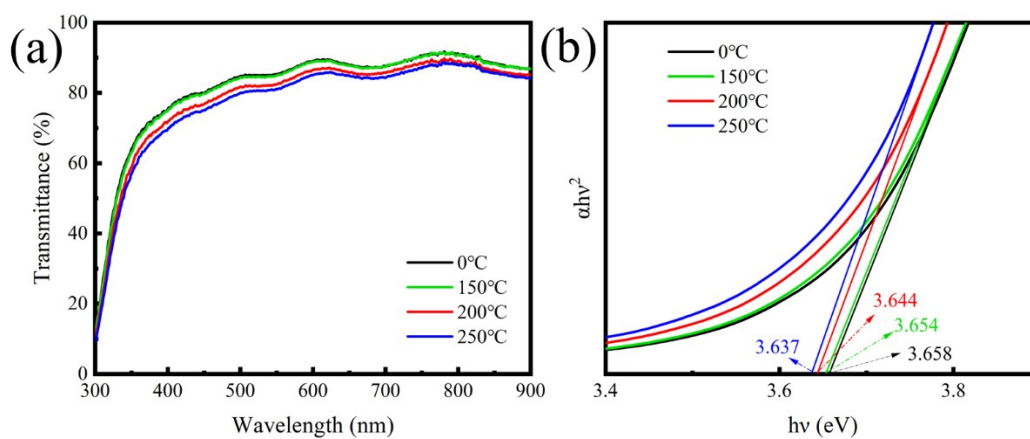

**Fig. S5.** Solar cells with different annealing temperatures NiO<sub>x</sub> as HTL (a) UV-vis transmission spectra, (b) Optical band gap maps.

**Table S1** Parameter table of the device with different annealing temperature NiO<sub>x</sub> as HTL

| <i>Sample</i> | $V_{oc}$<br>(V) | $J_{sc}$<br>(mA cm <sup>-2</sup> ) | $FF$<br>(%) | PCE<br>(%) | $R_s$<br>( $\Omega$ ) | $R_{sh}$<br>( $\Omega$ ) |
|---------------|-----------------|------------------------------------|-------------|------------|-----------------------|--------------------------|
| 150°C         | 0.5146          | 17.14                              | 52.73       | 4.65       | 674.5550              | 22100.60                 |
| 200°C         | 0.6214          | 18.30                              | 57.60       | 6.55       | 494.1029              | 24871.33                 |
| 250°C         | 0.6358          | 16.74                              | 53.43       | 5.69       | 414.8466              | 10420.13                 |

**Table S2** Photovoltaic parameters based on 150°C

| <b>Sample</b> | <b>PCE</b> | <b><i>FF</i></b> | <b><math>J_{sc}</math></b>  | <b><math>V_{oc}</math></b> |
|---------------|------------|------------------|-----------------------------|----------------------------|
|               | <b>(%)</b> | <b>(%)</b>       | <b>(mA cm<sup>-2</sup>)</b> | <b>(V)</b>                 |
| 1             | 3.69171    | 43.28953         | 16.85596278                 | 0.505930847                |
| 2             | 4.49999    | 47.44965         | 17.75032427                 | 0.534284609                |
| 3             | 4.7698     | 48.1034          | 18.1552791                  | 0.546162462                |
| 4             | 4.57642    | 47.06189         | 17.46705009                 | 0.556719527                |
| 5             | 5.3347     | 51.79557         | 16.9703191                  | 0.606914095                |
| 6             | 3.91836    | 45.59349         | 14.86386043                 | 0.578189503                |
| 7             | 4.01617    | 55.29955         | 11.30332006                 | 0.642516068                |
| 8             | 4.08616    | 55.08205         | 11.60203712                 | 0.63939708                 |
| 9             | 4.81232    | 52.82838         | 14.0735877                  | 0.647264817                |
| 10            | 4.61608    | 51.51065         | 13.99344635                 | 0.640400041                |

**Table S3** Photovoltaic parameters based on 200°C

| <b>Sample</b> | <b>PCE</b> | <b><i>FF</i></b> | <b><math>J_{sc}</math></b>  | <b><math>V_{oc}</math></b> |
|---------------|------------|------------------|-----------------------------|----------------------------|
|               | <b>(%)</b> | <b>(%)</b>       | <b>(mA cm<sup>-2</sup>)</b> | <b>(V)</b>                 |
| 1             | 7.08442    | 60.14239         | 18.33685881                 | 0.642390129                |
| 2             | 7.01097    | 59.79723         | 18.38545496                 | 0.637709562                |
| 3             | 7.53757    | 61.46527         | 19.20903981                 | 0.638404225                |
| 4             | 7.1064     | 58.42422         | 19.03043103                 | 0.639157678                |
| 5             | 7.40649    | 59.5777          | 19.42862498                 | 0.639862705                |
| 6             | 7.40       | 60.1391          | 19.12125341                 | 0.64351534                 |
| 7             | 7.51276    | 59.45273         | 19.39016006                 | 0.651697749                |
| 8             | 7.70954    | 61.06469         | 19.69195644                 | 0.641135327                |
| 9             | 6.6213     | 57.04293         | 18.25138745                 | 0.635983017                |
| 10            | 6.99892    | 55.42556         | 19.36140108                 | 0.652205118                |



**Table S4** Photovoltaic parameters based on 250°C

| <b>Sample</b> | <b>PCE</b><br><b>(%)</b> | <b>FF</b><br><b>(%)</b> | <b>J<sub>sc</sub></b><br><b>(mA cm<sup>-2</sup>)</b> | <b>V<sub>oc</sub></b><br><b>(V)</b> |
|---------------|--------------------------|-------------------------|------------------------------------------------------|-------------------------------------|
| 1             | 5.71283                  | 58.24986                | 15.41303134                                          | 0.636310001                         |
| 2             | 5.70356                  | 57.69485                | 15.53072879                                          | 0.636527255                         |
| 3             | 5.357                    | 56.98004                | 15.10331821                                          | 0.62248128                          |
| 4             | 5.32497                  | 52.90714                | 15.74684271                                          | 0.639159886                         |
| 5             | 5.56895                  | 54.17266                | 16.14121255                                          | 0.636879125                         |
| 6             | 5.02083                  | 45.03661                | 18.70722872                                          | 0.595937072                         |
| 7             | 5.85013                  | 52.85174                | 18.48571287                                          | 0.598783361                         |
| 8             | 4.66504                  | 45.26224                | 17.80572554                                          | 0.578840919                         |
| 9             | 5.07064                  | 54.08005                | 16.66819935                                          | 0.562518553                         |
| 10            | 5.29653                  | 55.01408                | 17.08939128                                          | 0.563366408                         |

**Table S5** Photovoltaic parameters of devices prepared via different HTLs.

| <b>HTL</b>                            | <b>PCE</b><br><b>(%)</b> | <b>FF</b><br><b>(%)</b> | <b>J<sub>sc</sub></b><br><b>(mA cm<sup>-2</sup>)</b> | <b>V<sub>oc</sub></b><br><b>(V)</b> | <b>Year</b> |
|---------------------------------------|--------------------------|-------------------------|------------------------------------------------------|-------------------------------------|-------------|
| CsPbBr <sub>3</sub> <sup>[1]</sup>    | 7.82                     | 58.55                   | 21.50                                                | 0.62                                | 2020        |
| MnS <sup>[2]</sup>                    | 9.24                     | 65.48                   | 21.26                                                | 0.664                               | 2022        |
| MoO <sub>3</sub> <sup>[3]</sup>       | 7.20                     | 63                      | 16.53                                                | 0.63                                | 2022        |
| CZTS <sup>[4]</sup>                   | 6.06                     | 54.6                    | 27.12                                                | 0.409                               | 2021        |
| CuSCN <sup>[5]</sup>                  | 7.20                     | 58.1                    | 30.1                                                 | 0.412                               | 2019        |
| PbS <sup>[6]</sup>                    | 8.0                      | 65.06                   | 18.8                                                 | 0.65                                | 2022        |
| NiO <sub>x</sub> (Jin) <sup>[7]</sup> | 3.51                     | 40.86                   | 14.50                                                | 0.59                                | 2018        |
| NiO <sub>x</sub><br>(this work)       | 7.40                     | 60.14                   | 19.12                                                | 0.6435                              | 2023        |

- [1] C. H. Jiang, J. S. Yao, P. Huang, R. F. Tang, X. M. Wang, X. Y. Lei, H. L. Zeng, S. Chang, H. Z. Zhong, H. B. Yao, C. F. Zhu and T. Chen, *Cell Reports Physical Science*. 2020, **1** (1), 100001.
- [2] S. Y. Wang, Y. Q. Zhao, L. Q. Yao, C. Li, J. B. Gong, G. L. Chen, J. M. Li and X. D. Xiao, *Sci Bull (Beijing)*. 2022, **67** (3), 263-269.
- [3] Y. L. Xing, H. F. Guo, J. J. Liu, S. Zhang, J. H. Qiu, N. Y. Yuan and J. N. Ding, *Journal of alloys and compounds*. 2022, **927**, 166842.
- [4] F. L. Mu, Z. Liu, W. Zi, Y. Cao, X.M. Lu, Y. L. Li, Z. Q. Zhao, Z. Y. Xiao and N. Cheng, *Solar Energy*. 2021, **226**(15), 154-160.
- [5] K. H. Li, S. Y. Wang, C. Chen, R. Kondrotas, M. C. Hu, S. C. Lu, C. Wang, W. Chen and J. Tang, *Journal of Materials Chemistry A*. 2019. **7**(16), 9665-9672.
- [6] F. Y. Wu, Y. Q. Zhao, L. Q. Yao, Z. P. Huang, L. M. Lin, Y. P. Ma, S. Y. Chen, J. M. Li and G. L. Chen, *Chemical Engineering Journal*. 2022, **440**, 135872.
- [7] X. Jin, Y. Yuan, C. H. Jiang, H. X. Ju, G. S. Jiang, W. F. Liu, C. F. Zhu and T. Chen, *Solar Energy Materials and Solar Cells*. 2018, **185**, 542-548.
